# Supplementary material for: Electrophoretic propulsion of matchstick-shaped magnetodielectric particles in the presence of external magnetic fields in a nematic liquid crystal
Source: Royal Society of Chemistry journal article supplement (doi:10.1039/d3sm01382k), 2023-12-08
Supplement: d3sm01382k4.pdf [file d3sm01382k4.pdf]

## Supplementary Information for

### **Electrophoretic propulsion of matchstick-shaped magnetodielectric particles in the presence of external magnetic fields in a nematic liquid crystal**

Archana S<sup>1</sup>, Devika V S<sup>1</sup>, Prasanna More<sup>2</sup>, Ravi Kumar Pujala<sup>2</sup> and Surajit Dhara<sup>1\*</sup>

<sup>1</sup>School of Physics, University of Hyderabad, Hyderabad-500046, India

<sup>2</sup>Soft and Active Matter Group, Department of Physics, Indian Institute of Science Education and Research (IISER), Tirupati, Andhra Pradesh-517507, India

\*To whom correspondence should be addressed: [surajit@uohyd.ac.in](mailto:surajit@uohyd.ac.in)

This pdf file includes the description of the following:

Figure S1- S7

Table S1

Movie S1- S3

## 1. Brownian motion of dipoles and quadrupoles in ZLI-2293 NLC

Isolated elastic dipoles and quadrupoles in a planar cell are video recorded and the particle trajectories are obtained using a suitable particle tracking software. The mean square displacement (MSD) is calculated from the  $x$ - and  $y$ -position coordinates which vary linearly with time delay  $\tau$  (Fig. S1). The translational diffusion equation is given by,  $\langle(\Delta r_i)^2\rangle = 2D_i\tau$  where  $D_i$  is the diffusion coefficient,  $i = \parallel$  or  $\perp$  to the director,  $r_i$  can be  $x$  or  $y$ . The difference in values of  $\langle(\Delta x)^2\rangle$  and  $\langle(\Delta y)^2\rangle$  is due to the anisotropy in motion of the particle (Fig. S1). Then the diffusion coefficients,  $D_{\parallel}$  and  $D_{\perp}$  are obtained from the slopes of linear fits of  $\langle(\Delta x)^2\rangle$  and  $\langle(\Delta y)^2\rangle$  as a function of  $\tau$  and the corresponding drag coefficients,  $\zeta_{\parallel}$  and  $\zeta_{\perp}$  (Table S1) are obtained using the relation  $\zeta_i = \frac{k_B T}{D_i}$  where  $T$  is the room temperature at which experiment is carried out.

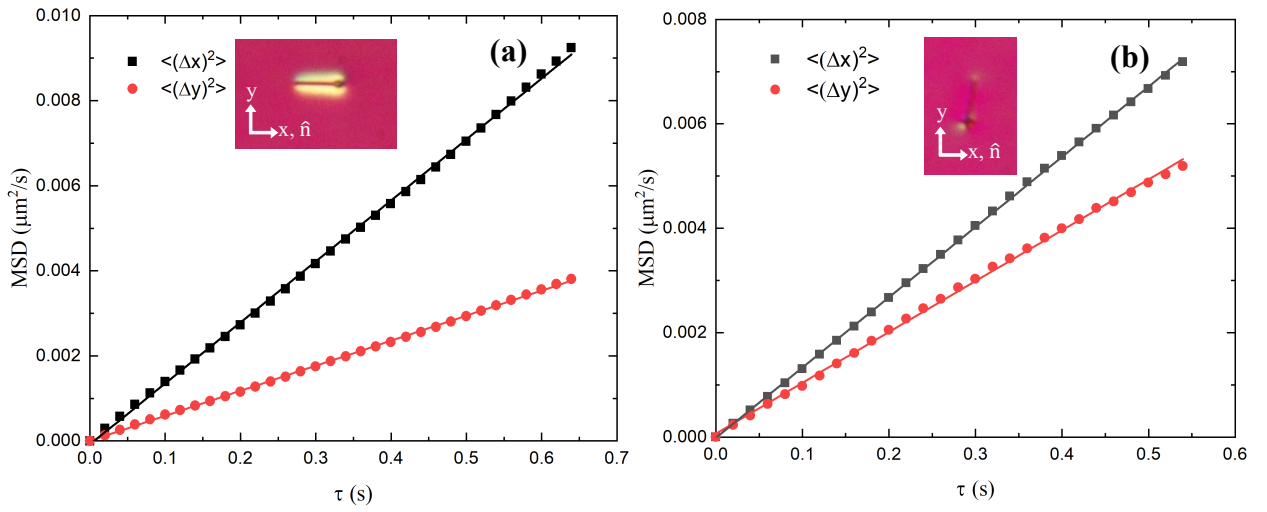

**Figure S1:** The position coordinates  $x$  and  $y$  of an elastic dipole and quadrupole. Mean square displacements along  $x$ - and  $y$ -axes in a planar cell as a function of  $\tau$  for a (a) dipole and (b) quadrupole. POM images of both dipole and quadrupole are shown with director  $\hat{n}$  along the  $x$ -axis. Diffusion coefficients and drag coefficients are given in Table S1.

|            | $D_{\parallel}(10^{-2}\mu\text{m}^2/\text{s})$ | $D_{\perp}(10^{-2}\mu\text{m}^2/\text{s})$ | $\zeta_{\parallel}(10^{-6}\text{kg/s})$ | $\zeta_{\perp}(10^{-6}\text{kg/s})$ |
|------------|------------------------------------------------|--------------------------------------------|-----------------------------------------|-------------------------------------|
| Dipole     | $0.67 \pm 0.1$                                 | $0.49 \pm 0.1$                             | $0.61 \pm 0.1$                          | $0.84 \pm 0.1$                      |
| Quadrupole | $0.71 \pm 0.1$                                 | $0.29 \pm 0.1$                             | $0.58 \pm 0.1$                          | $1.39 \pm 0.1$                      |

**Table S1:** Diffusion coefficients ( $D_{\parallel}$  and  $D_{\perp}$ ) and drag coefficients ( $\zeta_{\parallel}$  and  $\zeta_{\perp}$ ) for dipoles and quadrupoles along parallel and perpendicular to the director.

## 2. Interaction energy of dipole and quadrupole pairs in ZLI-2293 NLC.

The particles experience long-range elastic interactions. Here elastic force ( $F_{el}$ ) is balanced by the viscous drag force,  $F_{drag} = -\zeta \frac{dR(t)}{dt}$  in a nematic medium where  $\zeta$  is the drag coefficient,  $R(t)$  is the interparticle separation and the equation of motion is given by,  $F_{el} + F_{drag} = 0$ . Elastic forces are given by  $F_{el}^{dipole} = -\frac{k}{R^4}$  and  $F_{el}^{quadrupole} = -\frac{k}{R^6}$  for dipoles and quadrupoles respectively. From these relations, we will get the interparticle separation,  $R(t) = (R_0^5 - 5\alpha t)^{\frac{1}{5}}$  and  $R(t) = (R_0^7 - 7\alpha t)^{\frac{1}{7}}$  for dipoles and quadrupoles, respectively, where  $\alpha = \frac{k}{\zeta}$ . The elastic interaction potential energy is given by,  $W = \int F_{drag} \cdot dR$ . The interactions of two colinear particles are attractive with minimum  $W \approx -3400 k_B T$  and  $\approx -120 k_B T$  for dipoles and quadrupoles, respectively (See Fig. S2).

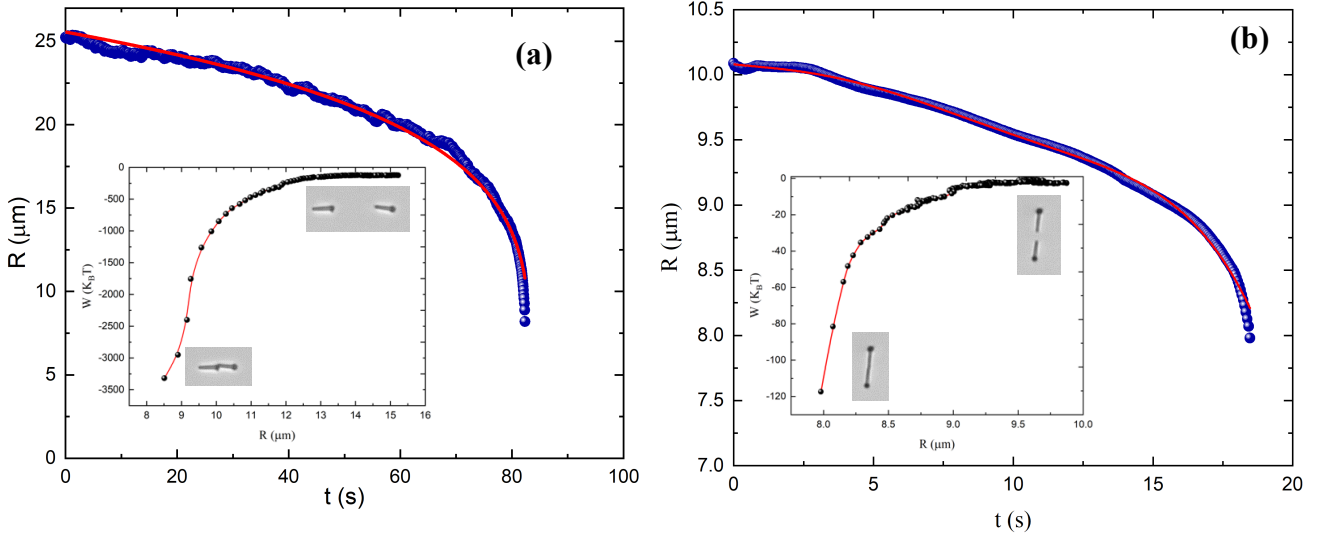

**Figure S2:** Variation of interparticle separation ( $R$ ) with time ( $t$ ) for (a) dipoles and (b) quadrupoles. The red curves show the nonlinear least square fit with the equations  $R(t) = (R_0^5 - 5\alpha t)^{\frac{1}{5}}$  and  $R(t) = (R_0^7 - 7\alpha t)^{\frac{1}{7}}$  for dipoles and quadrupoles, respectively.  $R_0$  is the separation at time  $t = 0$  and  $\alpha$  is obtained as  $(2.61 \pm 0.01) \times 10^4 \mu\text{m}^5/\text{s}$  and  $(3.47 \pm 0.13) \times 10^4 \mu\text{m}^7/\text{s}$  for dipoles and quadrupoles, respectively. The inset shows the interaction potential energy ( $W$ ) in units of  $k_B T$  as a function of separation ( $R$ ).

### 3. Dipolar assembly of match-stick shaped particles in NLC

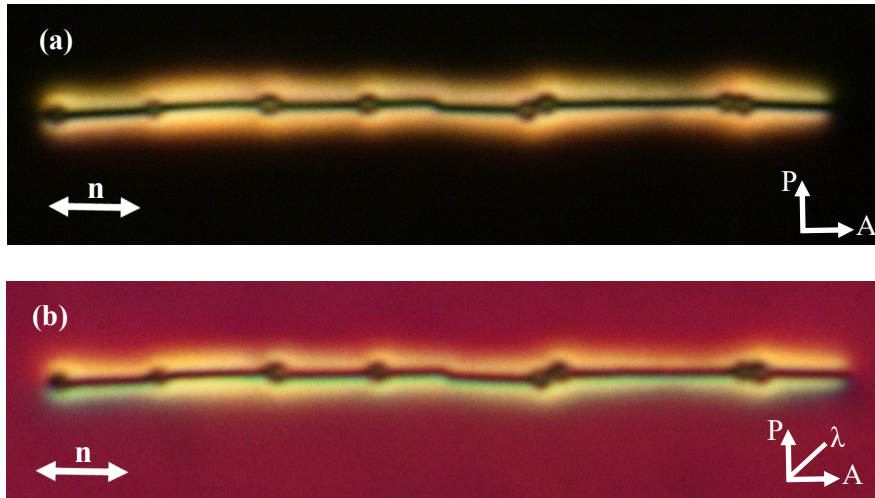

**Figure S3:** (a) POM and (b) full wave plate images of dipolar chains of matchstick-shaped particles. Double headed arrow shows the alignment direction of the director  $\mathbf{n}$ .

### 4. Motion of matchstick particles under in-plane transverse DC electric and magnetic fields in ZLI – 2293 NLC.

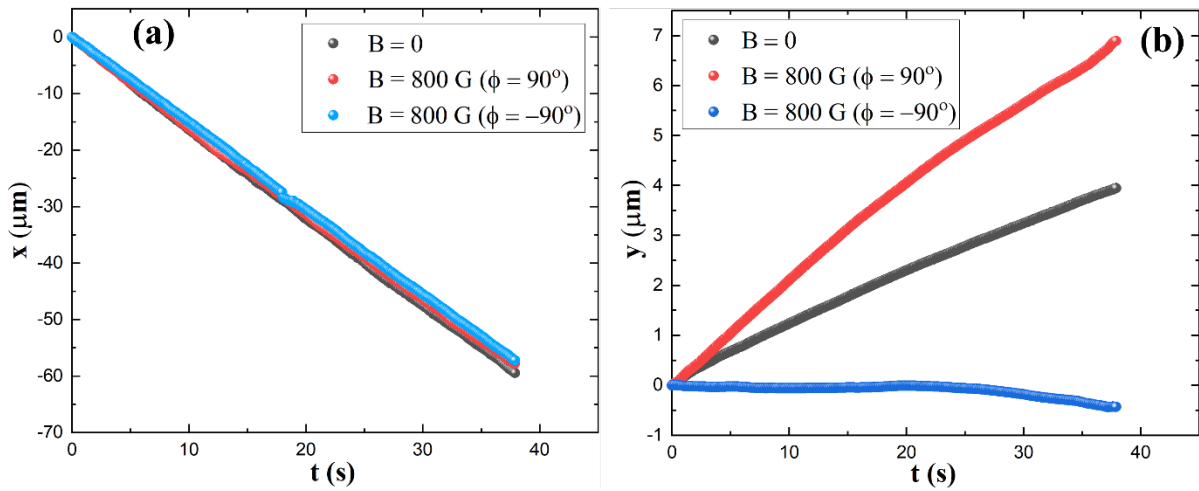

**Figure S4:** Variation in relative (a) x- and (b) y- coordinates with time for different values of  $\mathbf{B}$  for the particles under in-plane DC electric field ( $7.5 \times 10^3 \text{V/m}$ ).

**5. Motion of matchstick particles under in-plane transverse DC electric and magnetic fields in ZLI – 2293 NLC when the polarity of E is reversed.**

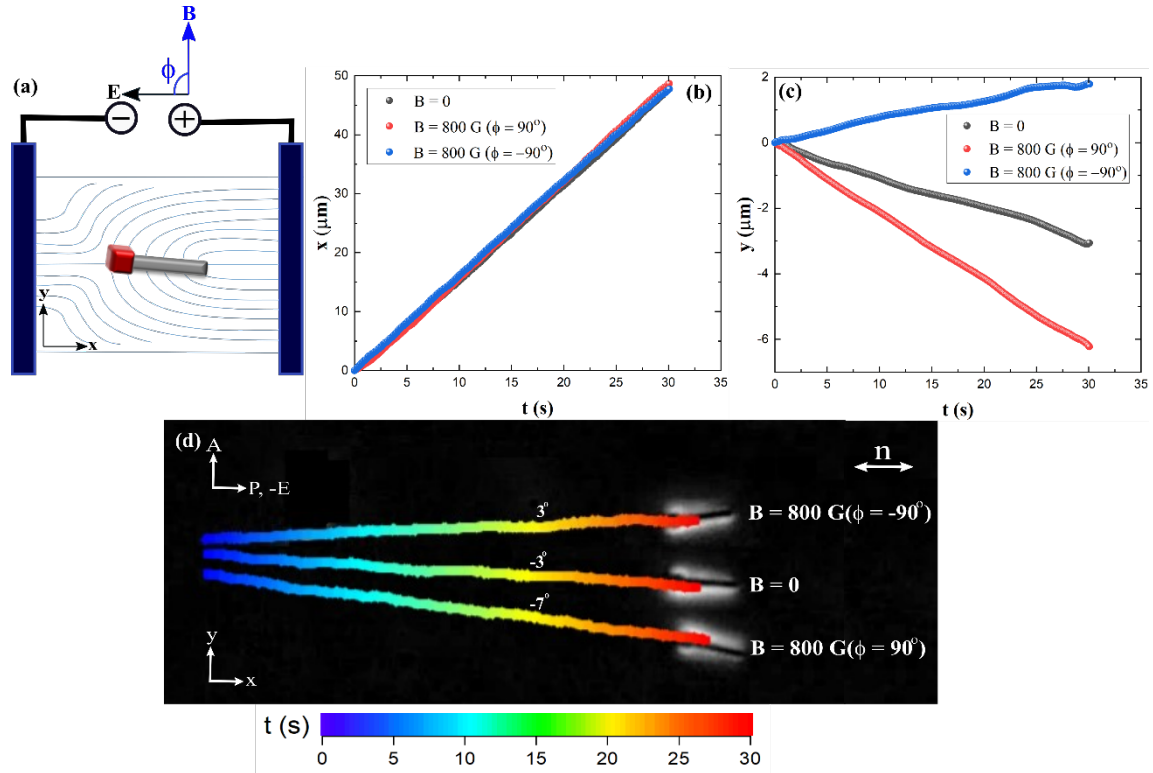

**Figure S5:** (a) Schematic of a planar cell with electric field  $E$  ( $7.5 \text{ mV}/\mu\text{m}$ ) between in-plane electrodes and magnetic field  $B$  ( $800\text{G}$ ) applied perpendicular to  $E$ . The director distortion and initial orientation of the matchstick is as shown. (b,c) Variation of  $x$ - and  $y$ - coordinates of the particle with time for different values of  $B$ . (d) Color coded trajectories depicting the motion of the particle when  $B = 0$ , and  $B = 800\text{G}$  ( $\phi = \pm 90^\circ$ );  $t_{min} = 0\text{s}$  and  $t_{max} = 30\text{s}$  (see Movie S2). The angle subtended by  $B$  with the director is denoted by  $\phi$ . The trajectory angles with respect to the director are mentioned in each case. Double-headed arrow denotes the director. The specified angles are accurate within  $\pm 1.5^\circ$ .

## 6. Variation of particle velocity with electric field and frequency in NLC (XV7039-200).

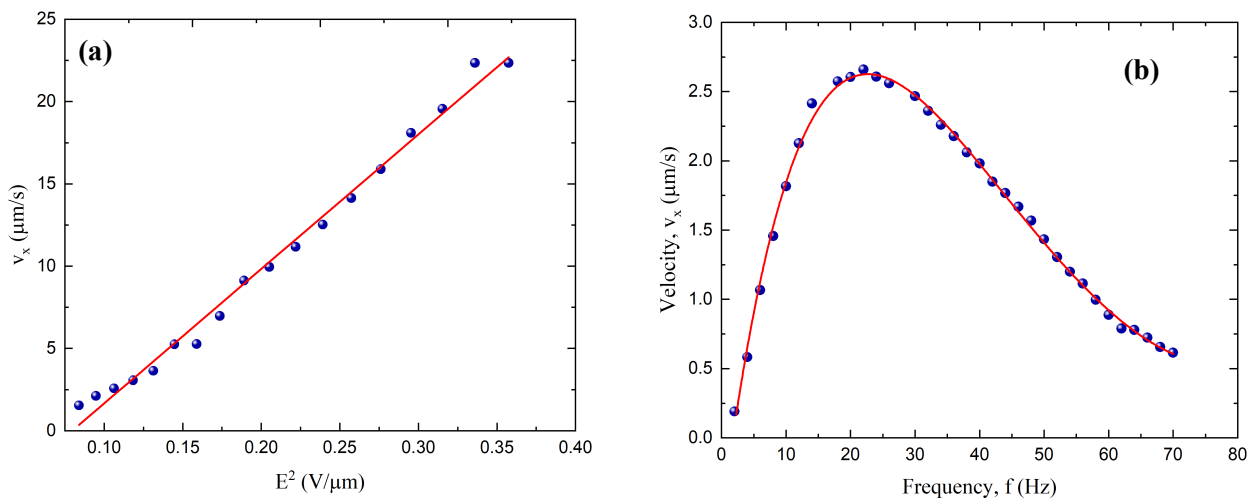

**Figure S6:** (a) Electric field dependent velocity ( $v_x$ ) at a fixed frequency 30 Hz for  $E$  above a threshold. Red line shows the linear least square fit to  $v_x = \beta E^2$  with slope  $\beta = (81.7 \pm 1.9) \mu\text{m}^3\text{s}^{-1}\text{V}^{-2}$ . (b) Variation of particle velocity with frequency at a fixed electric field ( $0.38 \text{ V}/\mu\text{m}$ ). The red curve is a guide to the eye.

## 7. Motion of matchstick particles under out of plane transverse AC electric and magnetic fields in XV7039-200 NLC.

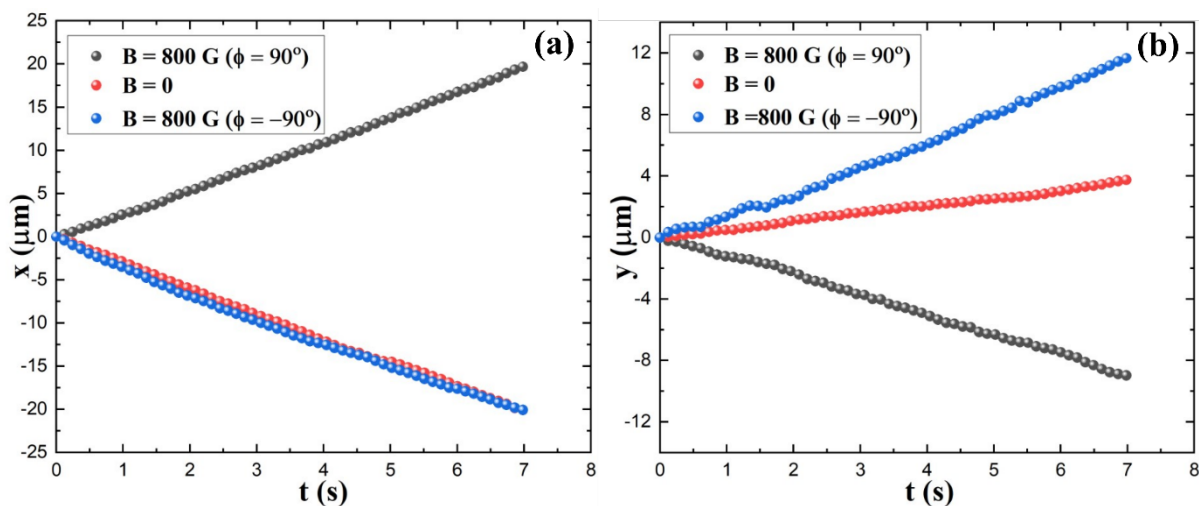

**Figure S7:** Variation in relative (a) x- and (b) y- coordinates with time for different values of  $B$  for the particles under out of plane AC electric field  $E(0.38 \text{ V}/\mu\text{m}, 30 \text{ Hz})$ .

## 8. Movies

**Movie S1:** Movie of a matchstick particle in ZLI-2293 with dipolar distortion moving under in-plane transverse DC electric and magnetic fields as shown in Fig.5a. The particle always moves towards the positive electrode. The value of the DC electric field,  $\mathbf{E}$  ( $= 7.5 \text{ mV}/\mu\text{m}$ ), and the magnetic field,  $\mathbf{B} = 800 \text{ G}$ . The angle subtended by  $\mathbf{B}$  with the director is denoted by  $\phi$ . (a) When  $\phi = 90^\circ$ , the trajectory makes an angle  $\approx 7^\circ$  with the director; the  $x$ - component of velocity  $v_x = -1.5 \text{ }\mu\text{m/s}$ , and the  $y$ - component of velocity  $v_y = 0.2 \text{ }\mu\text{m/s}$ . (b) When  $B = 0$ , the trajectory makes an angle  $\approx 4^\circ$  with the director;  $v_x = -1.5 \text{ }\mu\text{m/s}$ , and  $v_y = 0.1 \text{ }\mu\text{m/s}$ . (c) When  $\phi = -90^\circ$ , the trajectory makes an angle  $\approx -1^\circ$  with the director;  $v_x = -1.5 \text{ }\mu\text{m/s}$  and  $v_y = -0.01 \text{ }\mu\text{m/s}$ . The specified angles are accurate within  $\pm 1.5^\circ$ .

**Movie S2:** Movie of a matchstick particle in ZLI-2293 with dipolar distortion near the head of the matchstick moving under in-plane transverse DC electric and magnetic fields as shown in Fig. S4(a). The particle always moves towards the positive electrode. The value of the DC electric field,  $\mathbf{E} = 7.5 \text{ mV}/\mu\text{m}$ , and the magnetic field,  $\mathbf{B} = 800 \text{ G}$ . The angle subtended by  $\mathbf{B}$  with the director is denoted by  $\phi$ . (a) When  $\phi = -90^\circ$ , the trajectory makes an angle  $\approx 3^\circ$  with the director; the  $x$ - component of velocity  $v_x = 1.6 \text{ }\mu\text{m/s}$ , and the  $y$ - component of velocity  $v_y = 0.1 \text{ }\mu\text{m/s}$ . (b) When  $B = 0$ , the trajectory makes an angle  $\approx -3^\circ$  with the director;  $v_x = 1.6 \text{ }\mu\text{m/s}$ , and  $v_y = -0.1 \text{ }\mu\text{m/s}$ . (c) When  $\phi = 90^\circ$ , the trajectory makes an angle  $\approx -7^\circ$  with the director;  $v_x = 1.6 \text{ }\mu\text{m/s}$  and  $v_y = -0.2 \text{ }\mu\text{m/s}$ . The specified angles are accurate within  $\pm 1.5^\circ$ .

**Movie S3:** Microscopic video recording of a matchstick particle in XV7039-200 with dipolar distortion near the head of the matchstick moving under out-of-plane AC electric field,  $\mathbf{E}$  ( $0.38 \text{ V}/\mu\text{m}$ ,  $30 \text{ Hz}$ ) and an in-plane orthogonal magnetic field,  $\mathbf{B} = 800 \text{ G}$ . The angle subtended by  $\mathbf{B}$  with the director is denoted by  $\phi$ . Due to the AC electric field  $E\hat{\mathbf{z}}$ , the particle tilts in the  $z$ -direction and moves in the  $xy$ - plane. (a) When  $\phi = 90^\circ$ , the particle trajectory makes an angle  $\approx -25^\circ$  with the director. The  $x$ - component of velocity  $v_x = 2.8 \text{ }\mu\text{m/s}$ , and  $y$ - component of velocity  $v_y = -1.3 \text{ }\mu\text{m/s}$ . (b) When  $B = 0$ , the trajectory makes an angle  $\approx 10^\circ$  with the director;  $v_x = -2.8 \text{ }\mu\text{m/s}$ , and  $v_y = 0.5 \text{ }\mu\text{m/s}$ . (c) When  $\phi = -90^\circ$ , the trajectory makes an angle  $\approx 37^\circ$  with the director;  $v_x = -2.9 \text{ }\mu\text{m/s}$ , and  $v_y = 1.7 \text{ }\mu\text{m/s}$ . The specified angles are accurate within  $\pm 1.5^\circ$ .
